# Supplementary material for: Growing Co–Ni–Se nanosheets on 3D carbon frameworks as advanced dual functional electrodes for supercapacitors and sodium ion batteries
Source: Royal Society of Chemistry journal article supplement (doi:10.1039/d2qi00695b), 2022-01-01
Supplement: d2qi00695b1.pdf [file d2qi00695b1.pdf]

## Supporting Information

### **Growing Co-Ni-Se nanosheets on 3D carbon frameworks as advanced dual functional electrodes for supercapacitors and sodium ion batteries**

Mingyue Gao<sup>a,#</sup>, Yanchun Xue<sup>a,#</sup>, Yutang Zhang<sup>a</sup>, Chengxing Zhu<sup>a</sup>, Haiwei Yu<sup>a</sup>, Xingmei Guo<sup>a,\*</sup>, Shasha Sun<sup>a</sup>, Shenglin Xiong<sup>b,\*</sup>, Qinghong Kong<sup>c</sup>, Junhao Zhang<sup>a,\*</sup>

<sup>a</sup>School of Environmental and Chemical Engineering, Jiangsu University of Science and Technology, Zhenjiang, Jiangsu 212003, China

<sup>b</sup>Key Laboratory of the Colloid and Interface Chemistry, Ministry of Education, School of Chemistry and Chemical Engineering, Shandong University, Jinan, 250100, PR China.

<sup>c</sup>School of the Environment and Safety Engineering, Jiangsu University, Zhenjiang, Jiangsu, 212013, China

Corresponding author: guoxm@just.edu.cn (X. Guo); chexsl@sdu.edu.cn (S. Xiong); jhzhzhang6@just.edu.cn (J. Zhang)

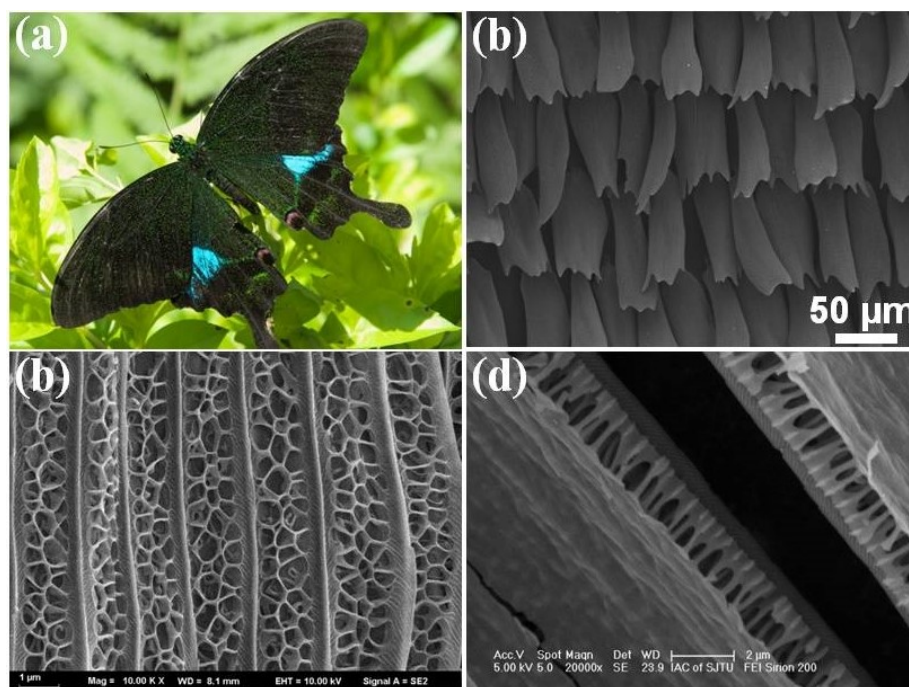

**Fig. S1** (a) The photograph of butterfly; (b-d) butterfly-wing-derived carbon framework.

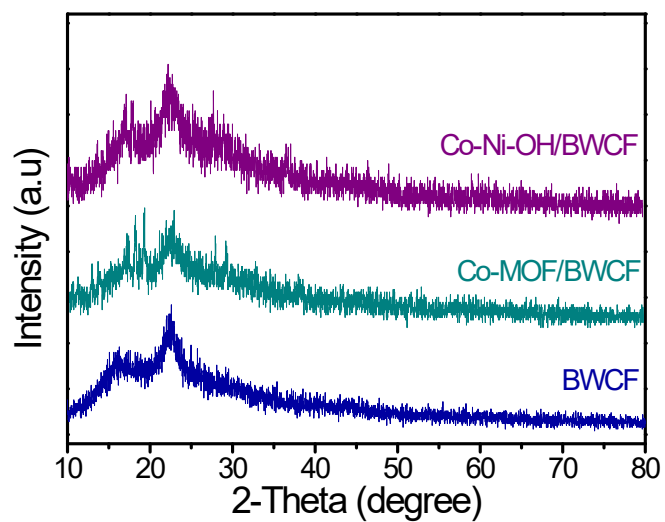

**Fig. S2** XRD patterns of BWCF, Co-MOF/BWCF (ZIF-67/BWCF) and Co-Ni-OH/BWCF.

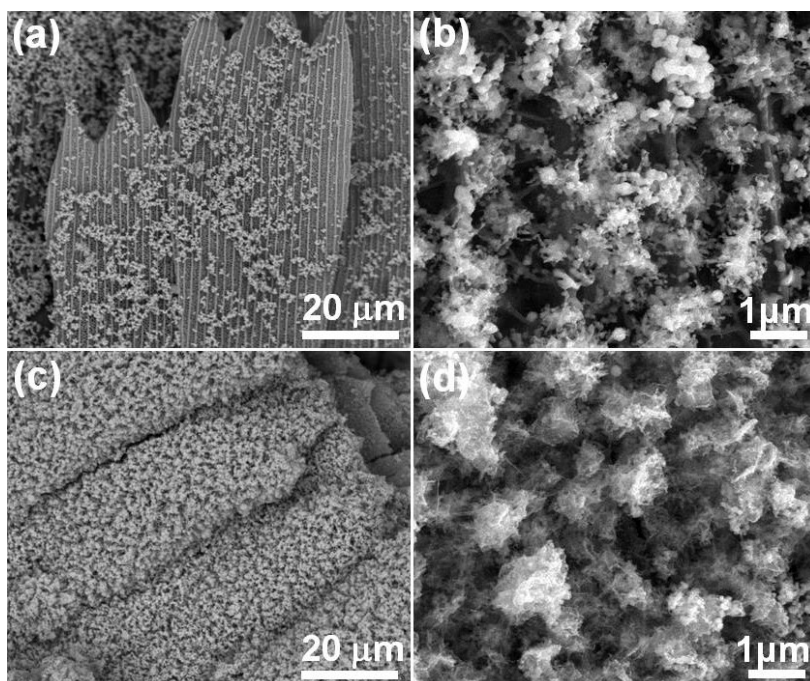

**Fig. S3** FESEM images: (a, b) Co-Ni-Se/BWCF-140; (c, d) Co-Ni-Se/BWCF-180.

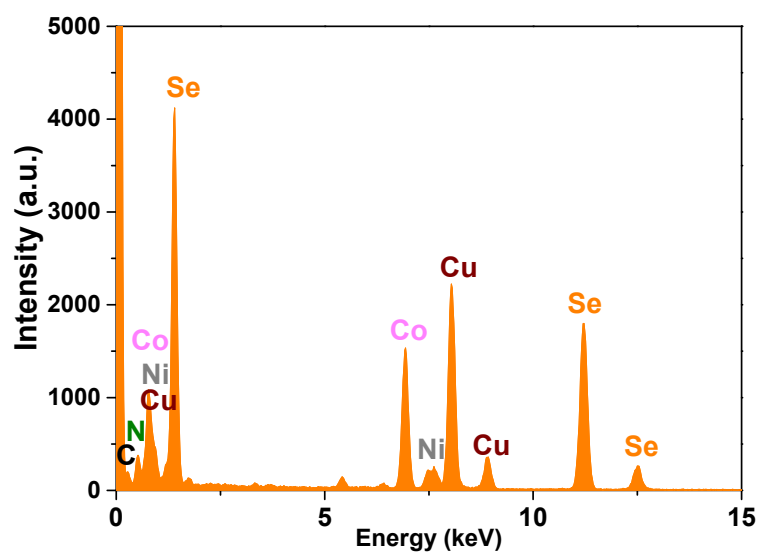

**Fig. S4** EDS spectrum of Co-Ni-Se/BWCF-160.

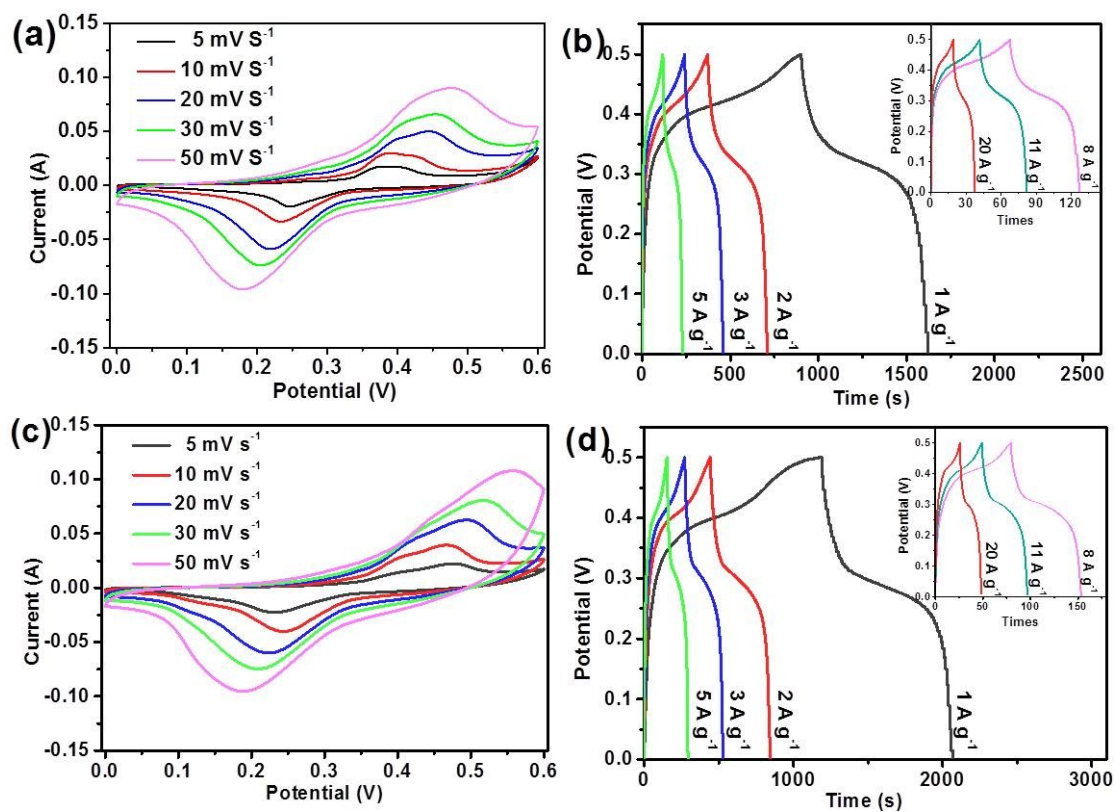

**Fig. S5** (a) CV curves of Co-Ni-Se/BWCF-140 at various sweep rates; (b) Galvanostatic charge/discharge curves of Co-Ni-Se/BWCF-140 at different current densities; (c) CV curves of Co-Ni-Se/BWCF-180 at various sweep rates; (d) Galvanostatic charge/discharge curves of Co-Ni-Se/BWCF-180 at different current densities.

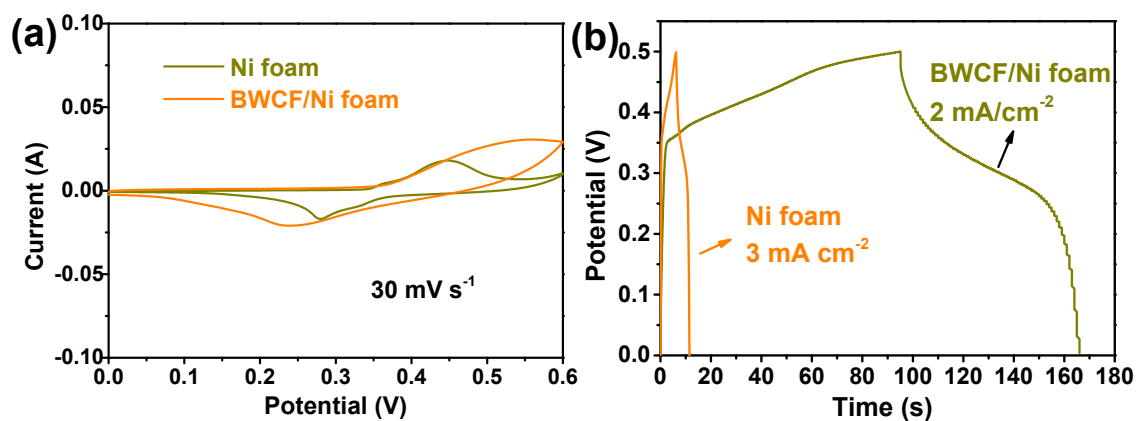

**Fig. S6** (a) CV curves at different scan rates and (b) GCD curves at different current densities of Ni foam and BWCF/Ni foam.

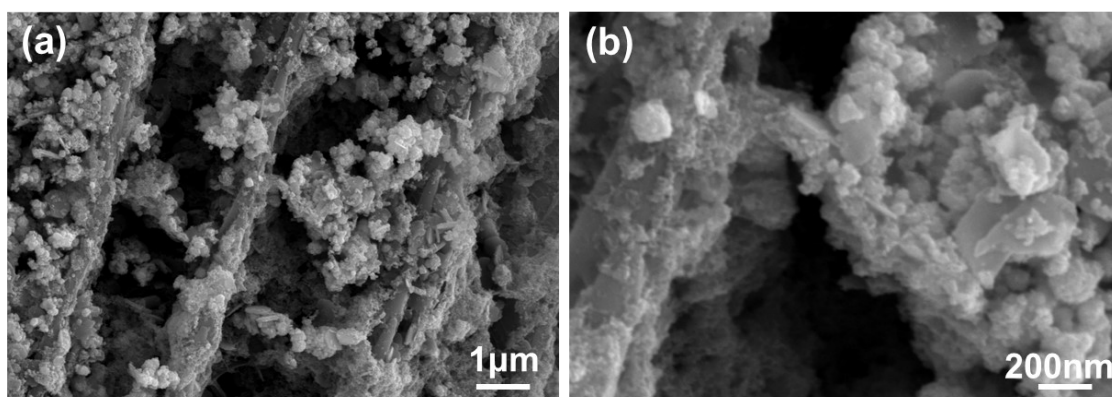

**Fig. S7** SEM images of Co-Ni-Se/BWCF-160 after testing in SCs for 200 cycles under  $20 \text{ A g}^{-1}$ .

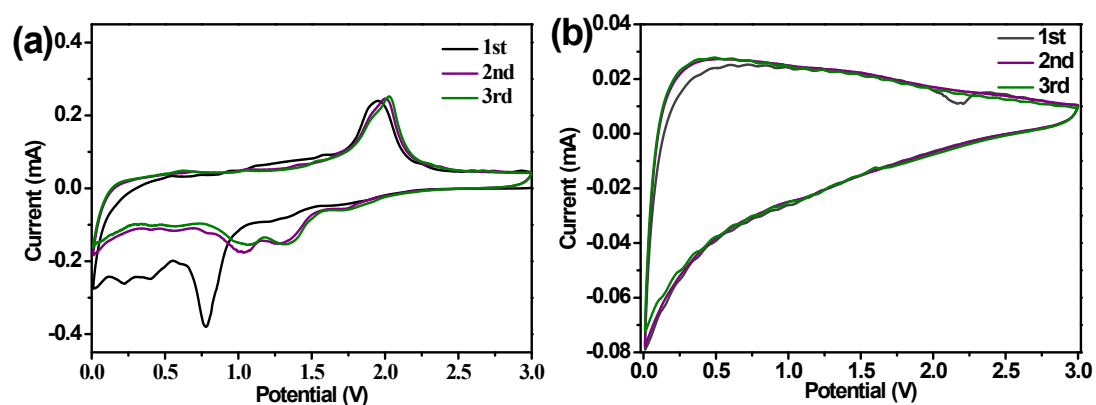

**Fig. S8** CV curves of (a) Co-Se/BWCF and (b) BWCF as SIB anodes at  $0.2 \text{ mV s}^{-1}$ .

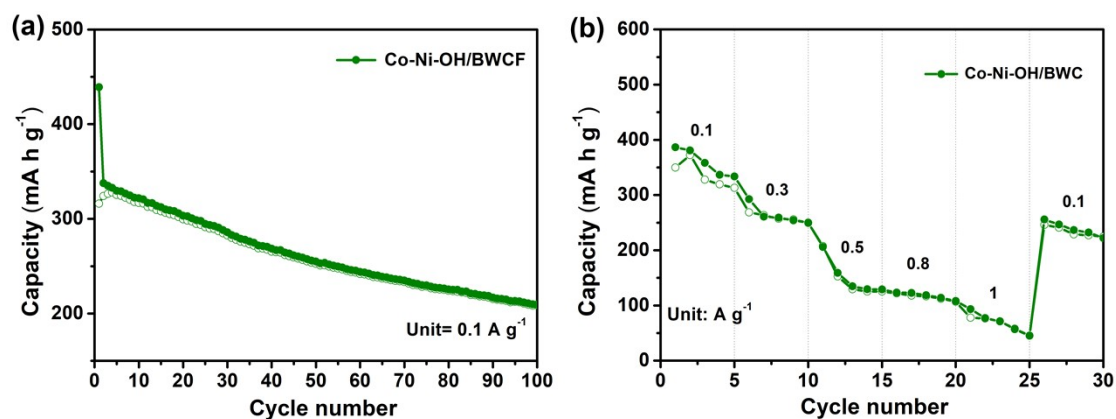

**Fig. S9** (a) Cycling performance at 0.1 A g<sup>-1</sup> and (b) rate performance of Co-Se-OH/BWCF as SIB anode.

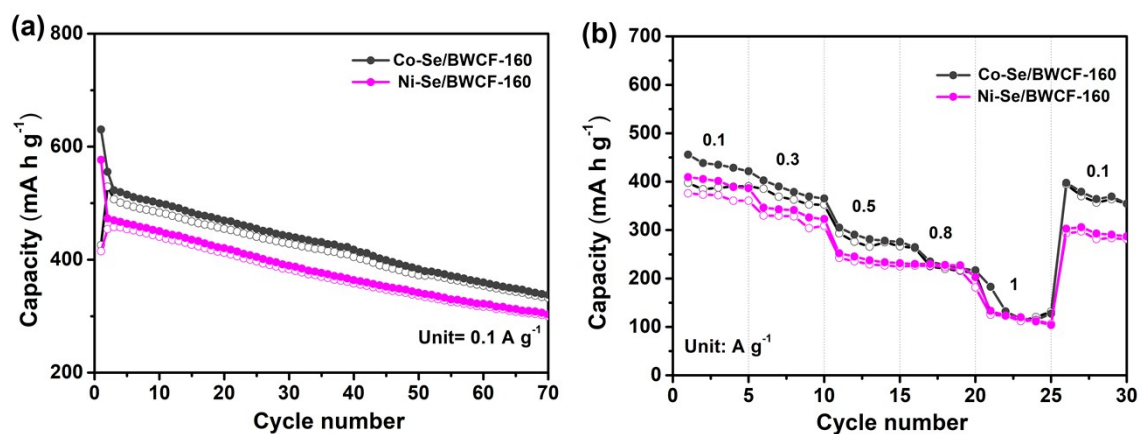

**Fig. S10** (a) Cycling performances at 0.1 A g<sup>-1</sup> and (b) rate performances of Co-Se/BWCF-160 and Ni-Se/BWCF-160.

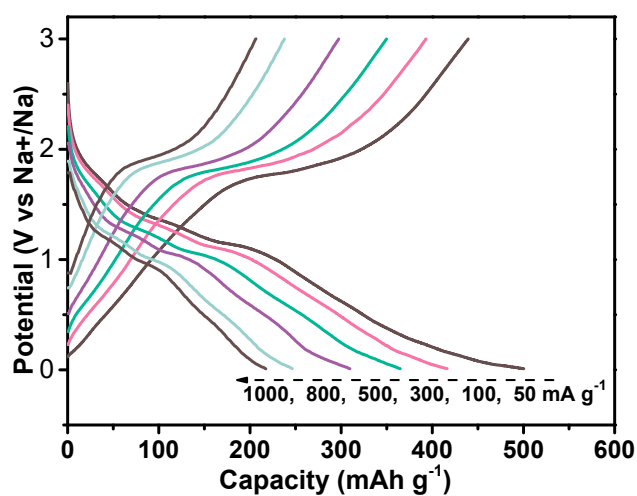

**Fig. S11** Charge-discharge curves of Co-Ni-Se/BWCF-160 in the first cycle at different current densities.

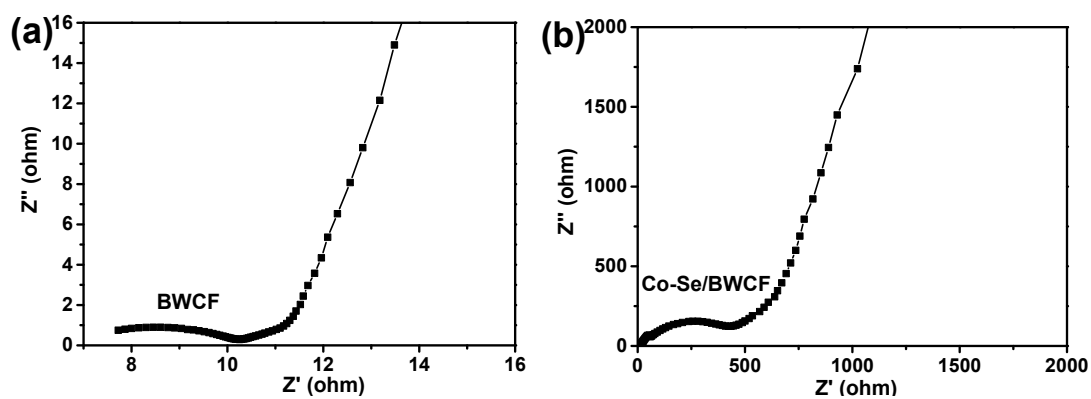

**Fig. S12** Nyquist plots: (a) BWCF; (b) Co-Se/BWCF.

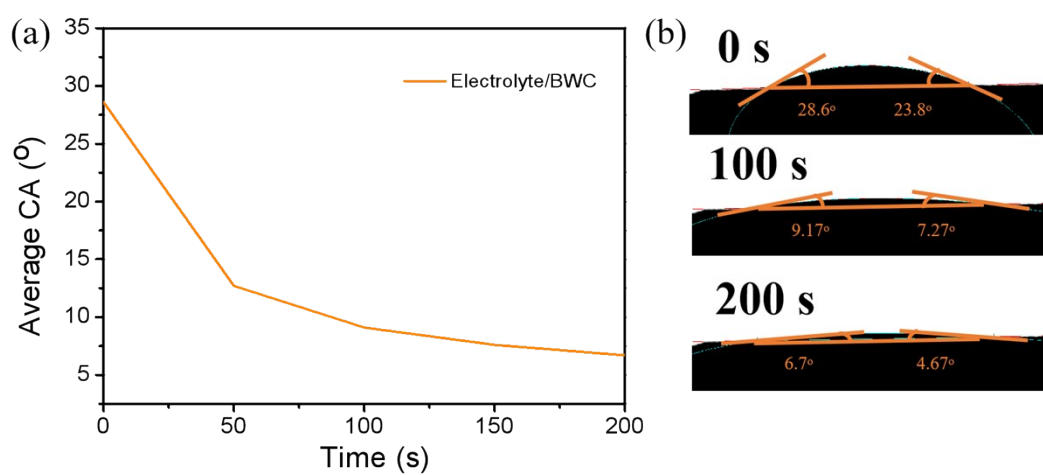

**Fig.S13** (a) Evolution of contact angle between electrolyte and Co-Ni-Se/BWCF-160; (b)Black and white photographs of drop evolution with time.

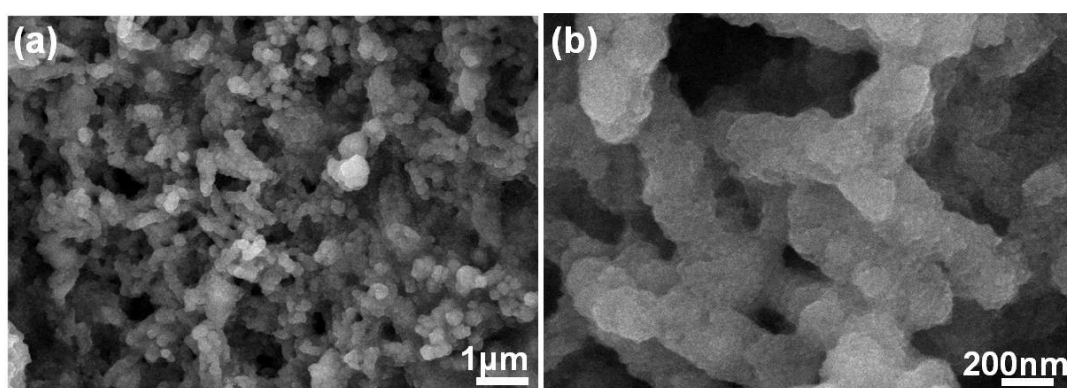

**Fig. S14** SEM images of Co-Ni-Se/BWCF-160 after 200 cycles.
